# Supplementary material for: Enhanced Wnt Signalling in Hepatocytes is Associated with Schistosoma japonicum Infection and Contributes to Liver Fibrosis
Source: Sci Rep. 2017 Mar 22;7:230. doi: 10.1038/s41598-017-00377-4 (PMC5428310; doi:10.1038/s41598-017-00377-4)
Supplement: Supplementary file 1 — Supplementary information [file 41598_2017_377_MOESM1_ESM.pdf]

**Enhanced Wnt Signalling in Hepatocytes is Associated with  
*Schistosoma japonicum* Infection and Contributes to Liver Fibrosis**

Qi Wang, Xin Chou, Fei Guan, Zhengming Fang, Shengjun Lu, Jiahui Lei, Yonglong  
Li, Wenqi Liu\*

Department of Parasitology, School of Basic Medicine, Tongji Medical College,  
Huazhong University of Science and Technology, Wuhan, Hubei, P.R. China

Correspondence and requests for materials should be addressed to W.L. (Email:  
liu\_wq2002cn@hotmail.com)

**Supplementary Figure**

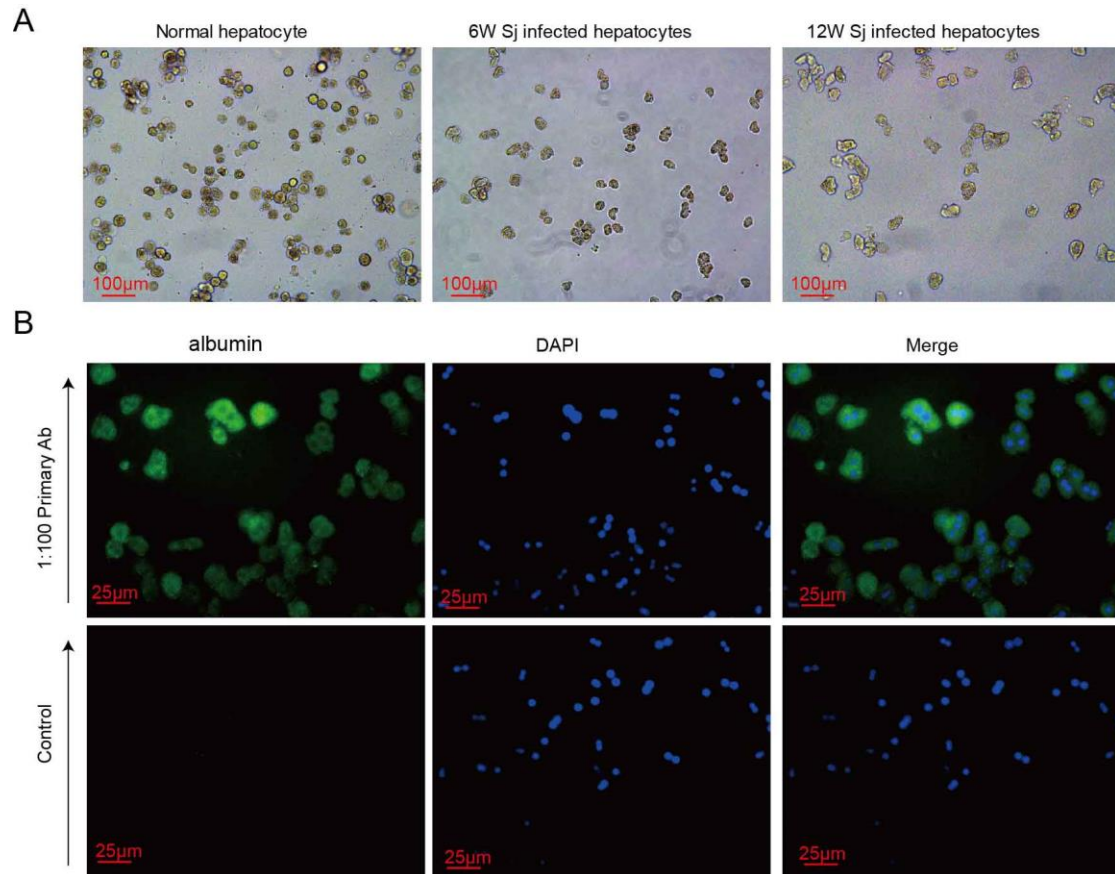

13 **Supplementary Figure 1. Successful isolation of hepatocytes.**

14 Primary hepatocytes were isolated from normal mice and mice infected with *S.*  
15 *japonicum* for 6 or 12 weeks. (A) Phase contrast microscopic pictures of freshly isolated  
16 hepatocytes. (B) The purity of the freshly isolated hepatocytes was detected by  
17 immunofluorescence analysis using a FITC-conjugated anti-albumin antibody. Scale  
18 bar, 100  $\mu\text{m}$  (A) and 25  $\mu\text{m}$  (B)

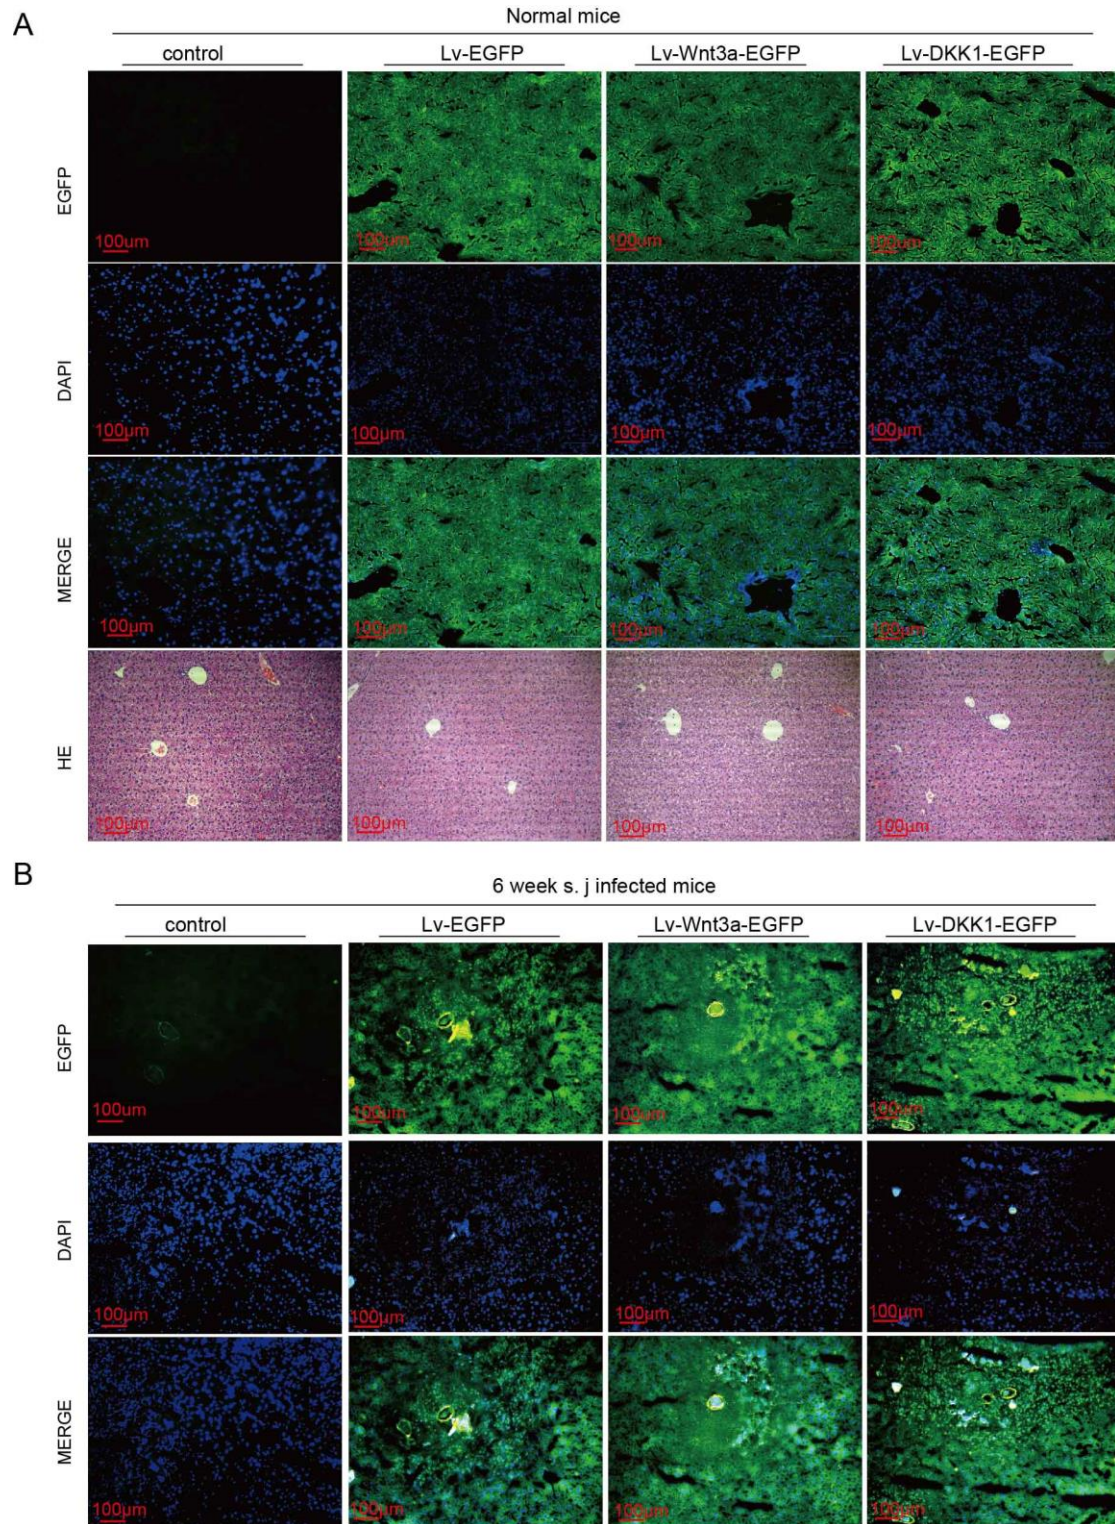

**Supplementary Figure 2. Successful transfection and expression of recombinant lentiviruses (Lv-EGFP, Lv-Wnt3a-EGFP and Lv-Dkk1-EGFP) in the livers of mice infected with *S. japonicum*.**

Either Lv-EGFP, Lv-Wnt3a-EGFP or Lv-Dkk1-EGFP was injected via the tail vein into

24 normal mice or mice that had been infected with *S. japonicum* for 6 weeks. Two weeks  
25 later, clear green fluorescence was observed in the frozen sections of the liver tissues  
26 (A B), and HE staining was used to observe the pathological changes in the liver (A).  
27 Sj, *S. japonicum*. Scale bar, 100 μm.

28  
29  
30  
31  
32  
33  
34  
35  
36  
37  
38  
39  
40  
41  
42

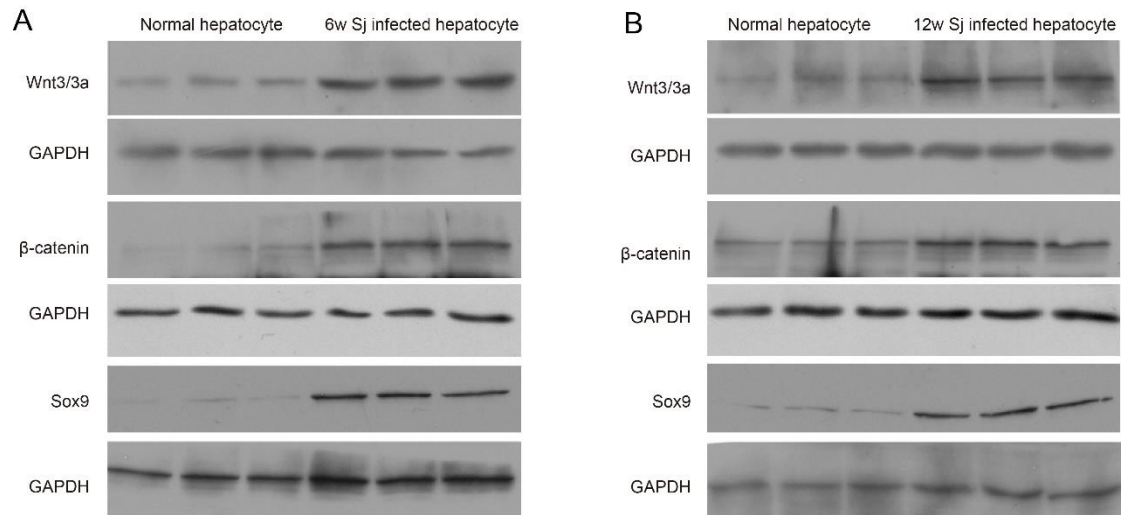

**Supplementary Figure 3 (response to Fig1. C).** Primary hepatocytes were isolated from normal mice and mice with *S. japonicum* infection. (A B) The expression of Wnt3/3a, β-catenin, and Sox9 was detected by western blotting 6 or 12 weeks p.i..

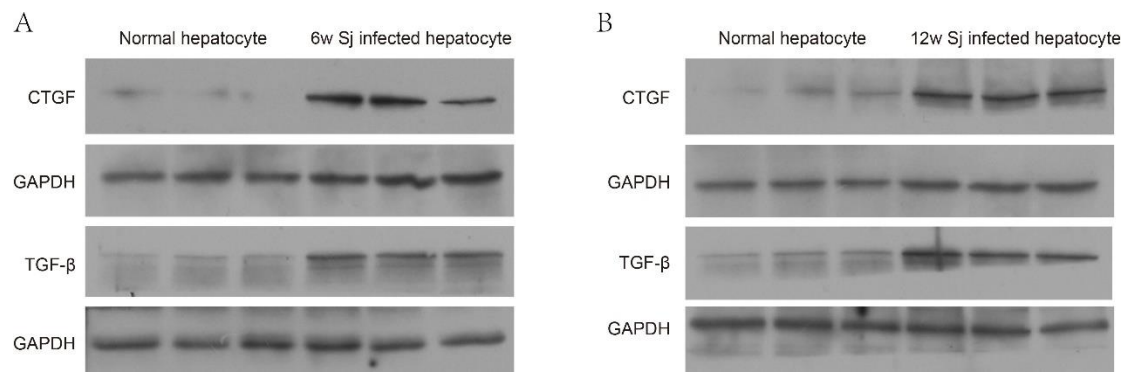

**Supplementary Figure 4 (response to Fig2. B).** Primary hepatocytes were isolated from normal mice and mice with *S. japonicum* infection. (A B) The expression of CTGF and TGF-β was detected by western blotting 6 or 12 weeks p.i..

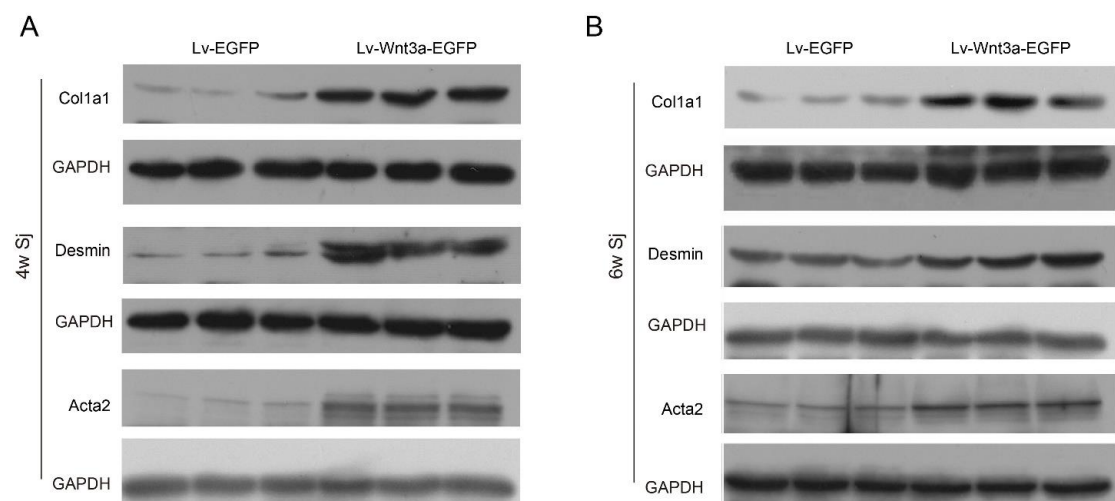

**Supplementary Figure 5 (response to Fig3. C).** Mice received either Lv-EGFP or Lv-Wnt3a-EGFP 4 or 6 weeks after *S. japonicum* infection. The hepatic expression of fibrotic markers (Col1a1, Desmin, and  $\alpha$ -SMA/Acta2) was assessed by western blotting.

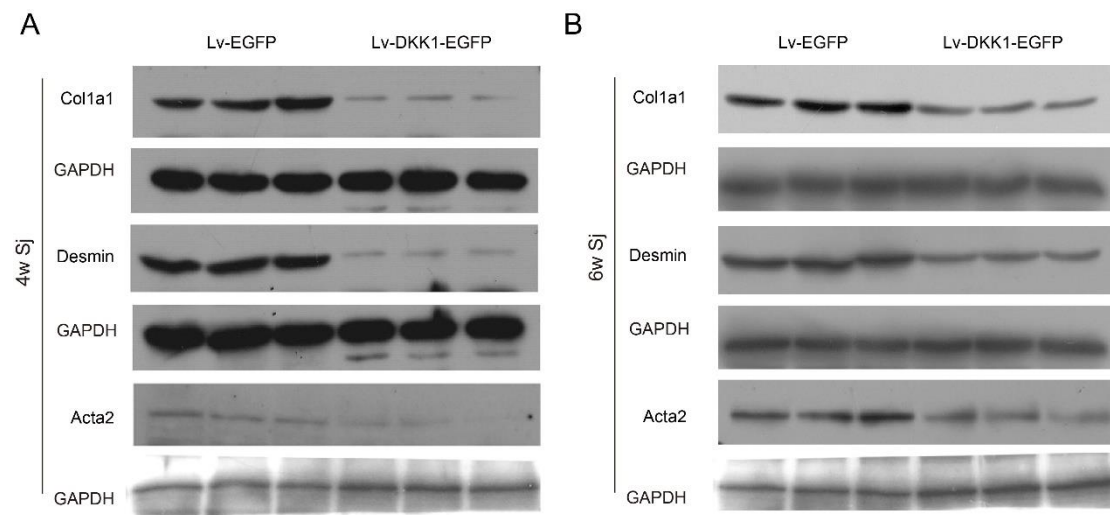

**Supplementary Figure 6 (response to Fig4. C).** Lv-DKK1-EGFP was injected via the tail vein to suppress Wnt signalling in the liver 4 or 6 weeks after *S. japonicum* infection. (A B) Fibrotic markers (Col1a1, Desmin, and  $\alpha$ -SMA/Acta2) in the liver were assessed by western blotting.

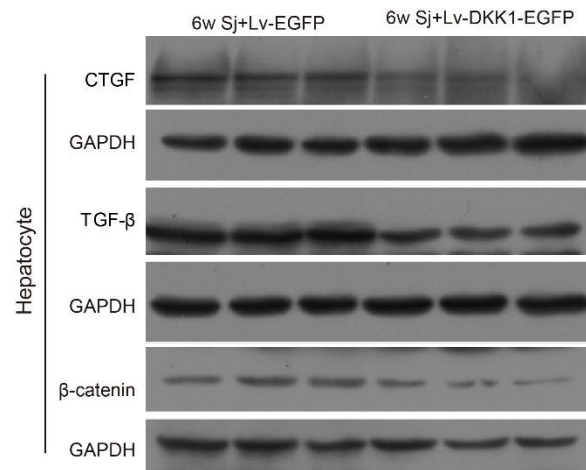

**Supplementary Figure 7 (response to Fig5. C).** Lv-DKK1-EGFP was injected via the tail vein to suppress after *S. japonicum* infection for 6 weeks. The hepatocytes were harvested to detect the pro-fibrotic growth factors (CTGF, TGF-β) and β-catenin in hepatocytes by western blotting.

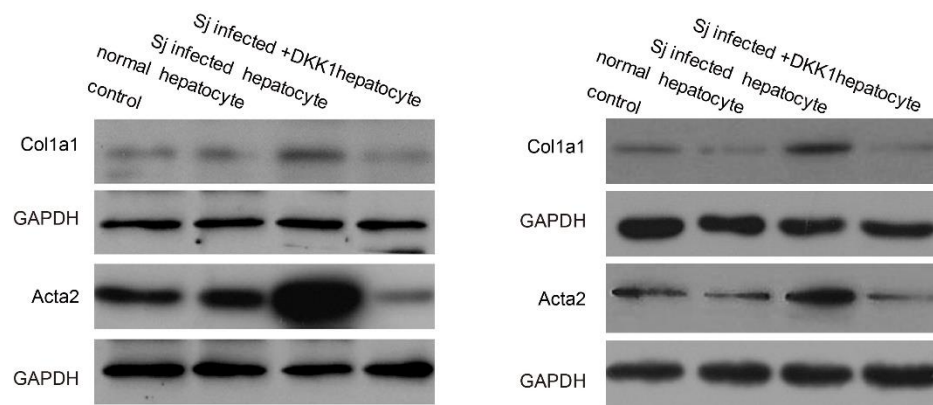

**Supplementary Figure 8 (response to Fig6. E).** The primary hepatocytes isolated from normal mice and *S. japonicum*-infected mice with or without Lv-DKK1-EGFP administration were co-cultured with primary HSCs. The protein expression of Col1a1 and  $\alpha$ -SMA/Acta2 of HSCs was analysed after co-culture by western blotting.

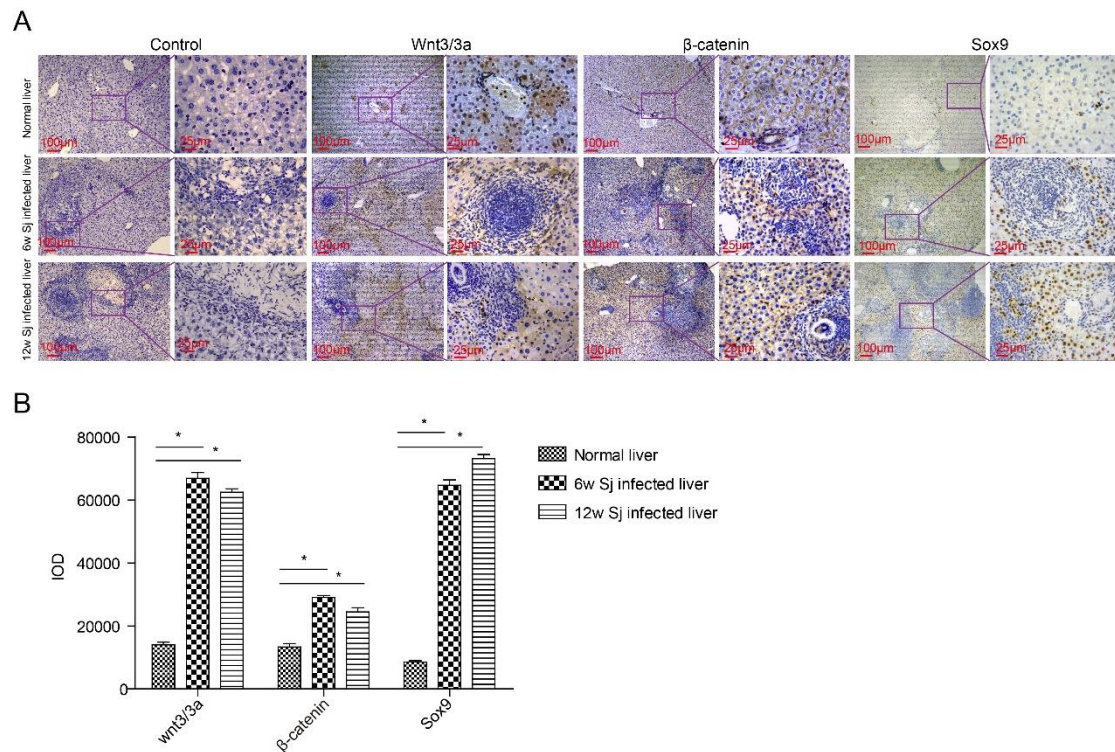

**Supplementary Figure 9 (response to Fig1. C). (A)** Liver sections from normal mouse and *S. japonicum* infected mouse were immunohistochemically stained for Wnt3/3a, β-catenin, and Sox9. **(B)** The integrated optical density (IOD) of Wnt3/3a, β-catenin, and Sox9 was assessed by Image-Pro Plus. Data represent the mean ± SEM; n= 5 (\* P < 0.05).

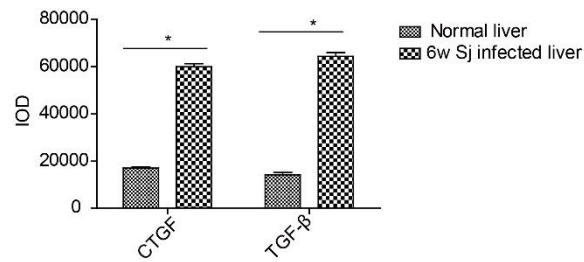

**Supplementary Figure 10 (response to Fig2. C).** Liver sections from normal mouse and *S. japonicum* infected mouse were immunohistochemically stained for CTGF and TGF-β. The IOD of CTGF and TGF-β was assessed by Image-Pro Plus. Data represent the mean ± SEM; n= 5 (\* P < 0.05).

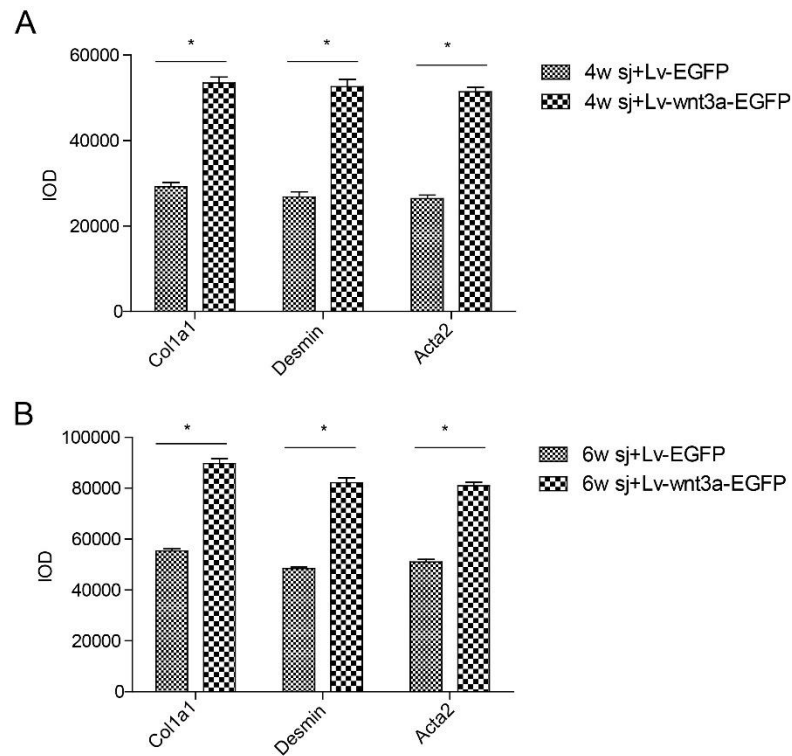

**Supplementary Figure 11 (response to Fig3. B).** Mice received either Lv-EGFP or Lv-Wnt3a-EGFP after *S. japonicum* infection for 4 (A) or 6 weeks (B). Hepatic expression of fibrotic markers (Colla1, desmin, and  $\alpha$ -SMA/Acta2) was assessed by immunohistochemical staining. (A B) The IOD of Colla1, Desmin, and  $\alpha$ -SMA/Acta2 was assessed by Image-Pro Plus. Data represent the mean  $\pm$  SEM; n= 5 (\* P < 0.05).

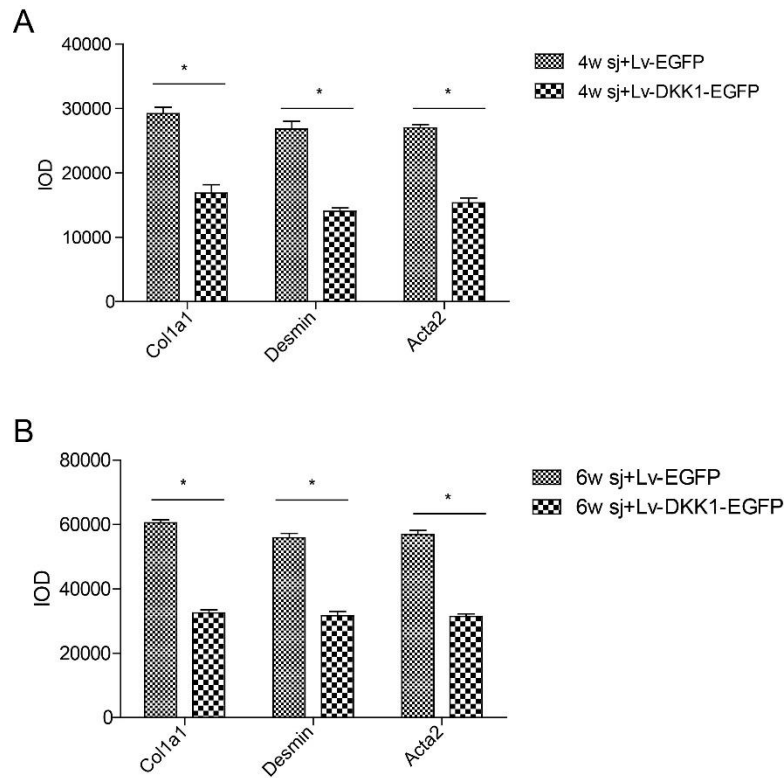

**Supplementary Figure 12 (response to Fig4. B).** Mice received either Lv-EGFP or Lv-DKK1-EGFP after *S. japonicum* infection for 4 (A) or 6 weeks (B). Hepatic expression of fibrotic markers (Col1a1, desmin, and  $\alpha$ -SMA/Acta2) was assessed by immunohistochemical staining. (A B) The IOD of Col1a1, Desmin, and  $\alpha$ -SMA/Acta2 was assessed by Image-Pro Plus. Data represent the mean  $\pm$  SEM; n= 5 (\* P < 0.05).

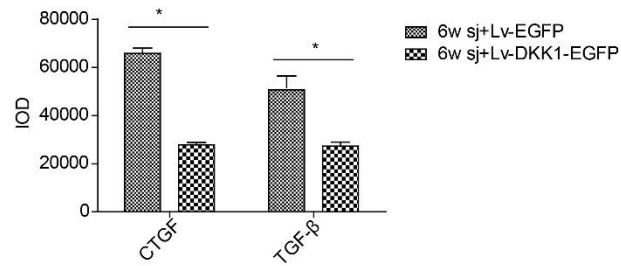

**Supplementary Figure 13 (response to Fig5. D).** Mice received either Lv-EGFP or Lv-DKK1-EGFP after *S. japonicum* infection for 6 weeks. The expression of pro-fibrotic growth factors (CTGF and TGF-β) in the liver was detected by immunohistochemical staining. The IOD of CTGF and TGF-β was assessed by Image-Pro Plus. Data represent the mean  $\pm$  SEM; n= 5 (\* P < 0.05).

## Supplementary material

The cDNA sequence of mouse Wnt3a used in present study: atggct cctctcgat acctcttagt

gctctgcagc ctgaagcagg ctctgggcag ctaccgatc tgggtgtcct tggctgtggg accccagtac

tcctctctga gcactcagcc cattctctgt gccagcatcc caggcctggt accgaagcag ctgcgcttct

gcaggaacta cgtggagatc atgcccagcg tggctgaggg tgtcaaagcg ggcatccagg agtgccagca

ccagttccga ggccggcggt ggaactgcac caccgtcagc aacagcctgg ccatctttgg ccctgttctg

gacaaagcca cccgggagtc agcctttgtc catgccatcg cctccgctgg agtagctttc gcagtgcac

gctcctgtgc agagggatca gctgctatct gtgggtgcag cagccgcctc cagggtctcc caggcgaggg

ctggaagtgg ggccggctgta gtgaggacat tgaatttga ggaatggtct ctggggagtt tgccgatgcc

agggagaacc ggccggatgc ccgctctgcc atgaaccgtc acaacaatga ggctgggagc caggccatcg

ccagtcacat gcacctcaag tgcaaatgcc acgggctatc tggcagctgt gaagtgaaga cctgctggtg

gtgcgagccg gacttccgca ccatcgggga ttctctcaag gacaagtatg acagtgcctc ggagatgggtg

gtagagaaac accgagagtc tcgtggctgg gtggagaccg tgaggccacg ttacacgtac ttcaagggtgc

cgacagaacg cgacctggtc tactacgagg cctcacccaa ctctgcgaa cctaaccgag aaaccggctc

cttcgggacg cgtgaccgca cctgcaatgt gagctcgcat ggcatagatg ggtgcgacct gttgtgctgc

gggcgcgggc ataacgcgcg cactgagcga cggagggaga aatgccactg tgtttccat tgggtgctgt

acgtcagctg ccaggagtgc acacgtgtct atgacgtgca cacctgcaag tag.

The cDNA sequence of mouse DKK1 used in present study: atg atggttgtgt gtgcagcggc

agctgtccgg ttcttgccg tgtttacaat gatggctctc tgcagcctcc ctctgctagg agccagtgcc acctgaact

cagttctcat caattccaac gcgatcaaga acctgcccc accgctgggt ggtgctgggg ggcagccggg

ctctgctgtc agtgtggcgc cgggagttct ctatgagggc gggaacaagt accagactct tgacaactac

cagccctacc ctgcgctga agatgaggag tgcggctctg acgagtactg ctccagcccc agccgcgggg

207 cagccggcgt cggaggtgta cagatctgtc tggcttgccg aaagcgcagg aagcgtgca tgaggcacgc  
208 tatgtgctgc cccgggaact actgcaaaaa tggaatatgc atgccctctg accacagcca tttcctcga  
209 ggggaaattg aggaaagcat cattgaaaac cttggtaatg accacaacgc cgccgcgggg gatggatata  
210 ccagaagaac cacactgact tcaaaaatat atcacaccaa aggacaagaa ggctccgtct gcctccgata  
211 atcagactgt gccgcagggc tgtgttgtgc aagacacttc tggccaaga tctgtaaacc tgccttaaa  
212 gaaggtcagg tgtgcaccaa gcacaaacgg aaaggctccc acgggctgga gatattccag cgctgttact  
213 gcggggaagg cctggcttgc aggatacaga aagatcacca tcaagccagc aattcttcta ggctccacac  
214 ctgccagaga cactaa.

215
